# Supplementary material
Source: PubMed Central journal article supplement (PMC8128062)
Supplement: MD-012-D0MD00433B-s001.pdf [file MD-012-D0MD00433B-s001.pdf]

## Supporting Information

### **Novel fluorinated ring-fused chlorins as promising PDT agents against melanoma and esophagus cancer**

Nelson A. M. Pereira,<sup>1</sup> Mafalda Laranjo,<sup>2,3,4</sup> Bruno F. O. Nascimento,<sup>1</sup> João C. S. Simões,<sup>1,2</sup> João Pina,<sup>1</sup> Bruna D. P. Costa,<sup>1,2</sup> Gonçalo Brites,<sup>2</sup> João Braz,<sup>1,2</sup> J. Sérgio Seixas de Melo,<sup>1</sup> Marta Piñeiro,<sup>1</sup> Maria Filomena Botelho,<sup>2,3,4</sup> Teresa M. V. D. Pinho e Melo<sup>1\*</sup>

<sup>1</sup>University of Coimbra, Coimbra Chemistry Centre (CQC) and Department of Chemistry, 3004-535 Coimbra, Portugal

<sup>2</sup>University of Coimbra, Institute of Biophysics and Institute for Clinical and Biomedical Research (iCBR), area of Environment Genetics and Oncobiology (CIMAGO), Faculty of Medicine, 3000-548 Coimbra, Portugal

<sup>3</sup>University of Coimbra, Center for Innovative Biomedicine and Biotechnology (CIBB), 3000-548 Coimbra, Portugal

<sup>4</sup>Clinical and Academic Centre of Coimbra, 3000-548 Coimbra, Portugal

\*tmelo@ci.uc.pt

#### **Table of contents**

|     |                                                             |    |
|-----|-------------------------------------------------------------|----|
| I.  | NMR Spectra of Compounds <b>4-8</b> .                       | S2 |
| II. | Photophysical Spectra of Chlorins <b>4</b> and <b>6-8</b> . | S9 |

# I. NMR Spectra of Compounds 4-8

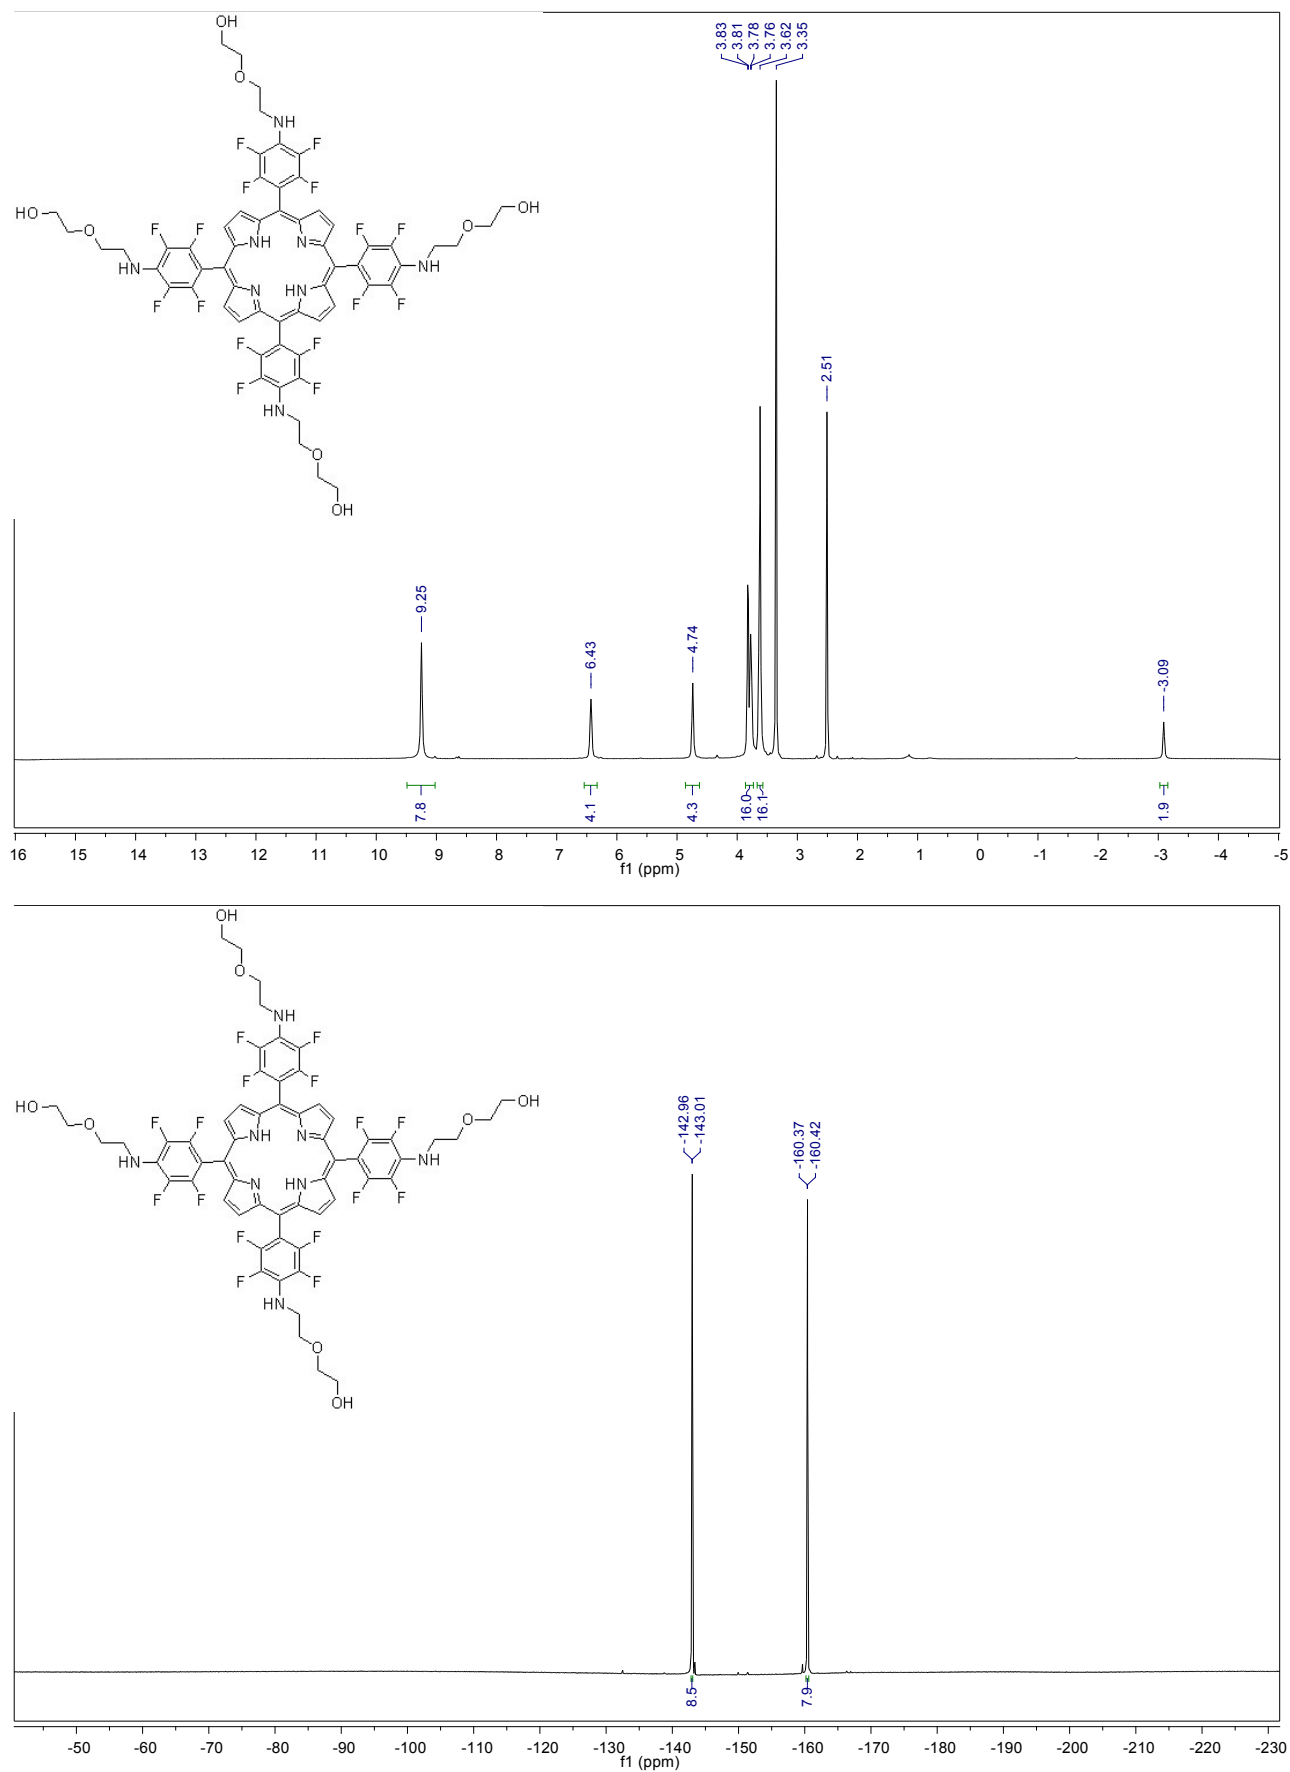

Figure S1. (a) <sup>1</sup>H NMR spectrum (top) and (b) <sup>19</sup>F NMR spectrum (bottom) of porphyrin 5 in DMSO-*d*<sub>6</sub>.

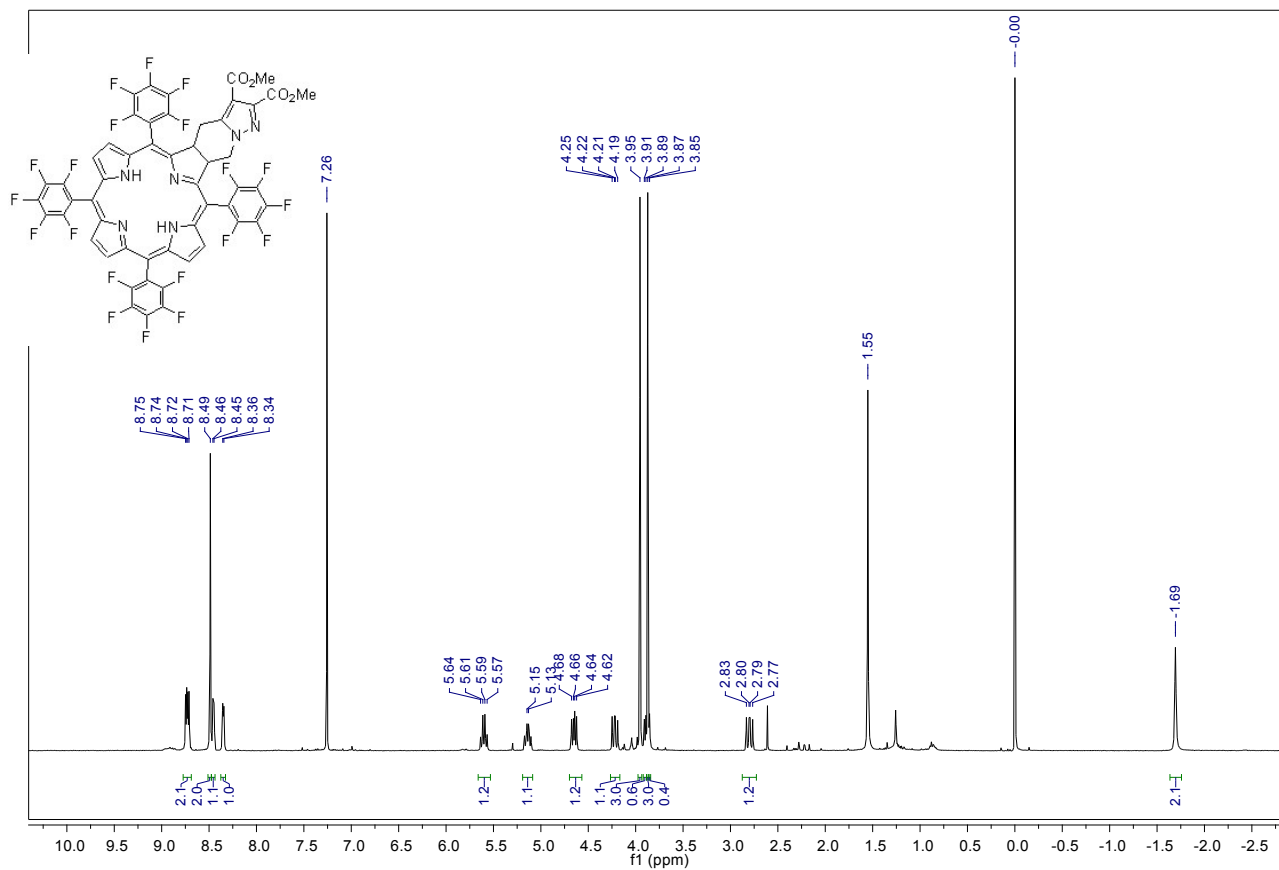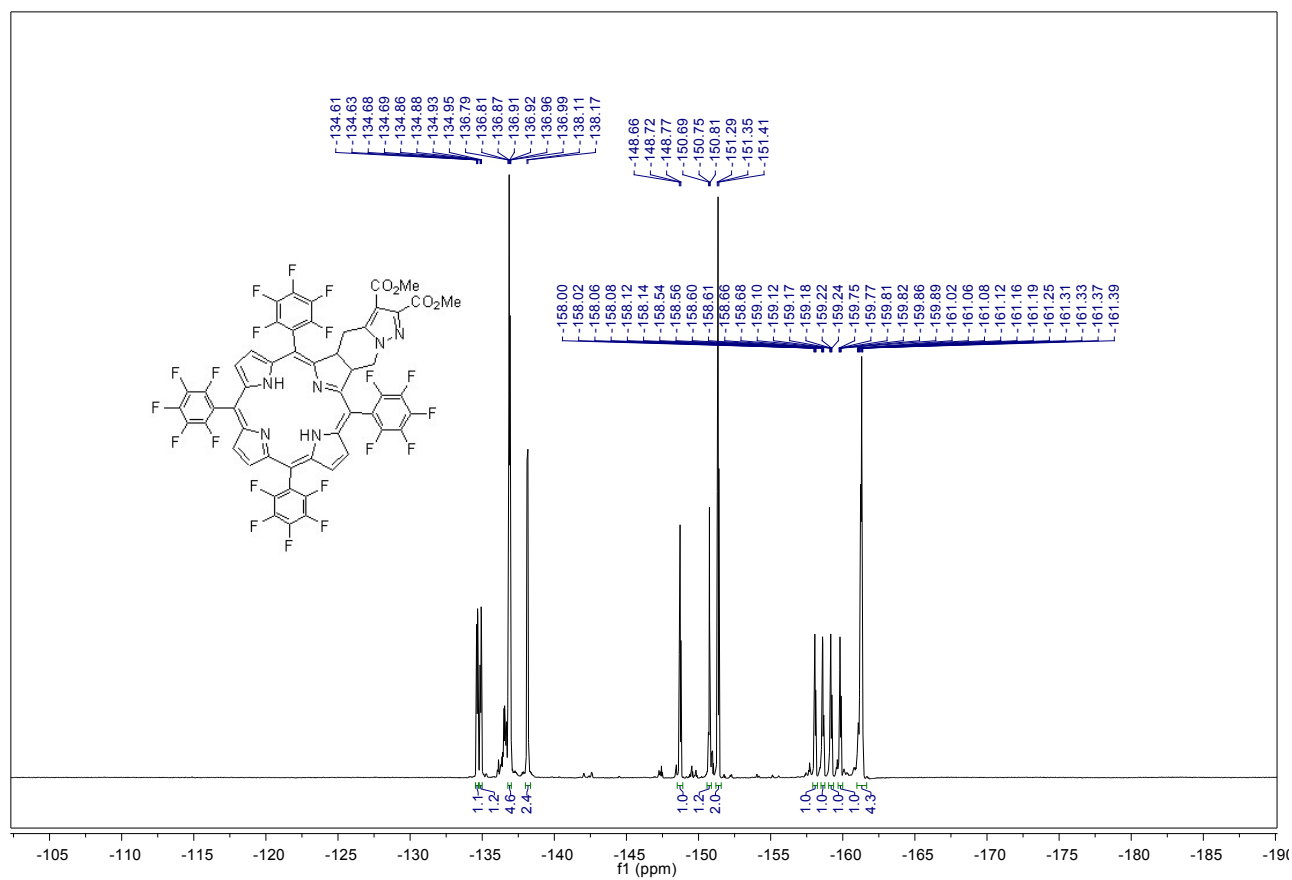

Figure S2. (a) <sup>1</sup>H NMR spectrum (top) and (b) <sup>19</sup>F NMR spectrum (bottom) of chlorin 4 in CDCl<sub>3</sub>.

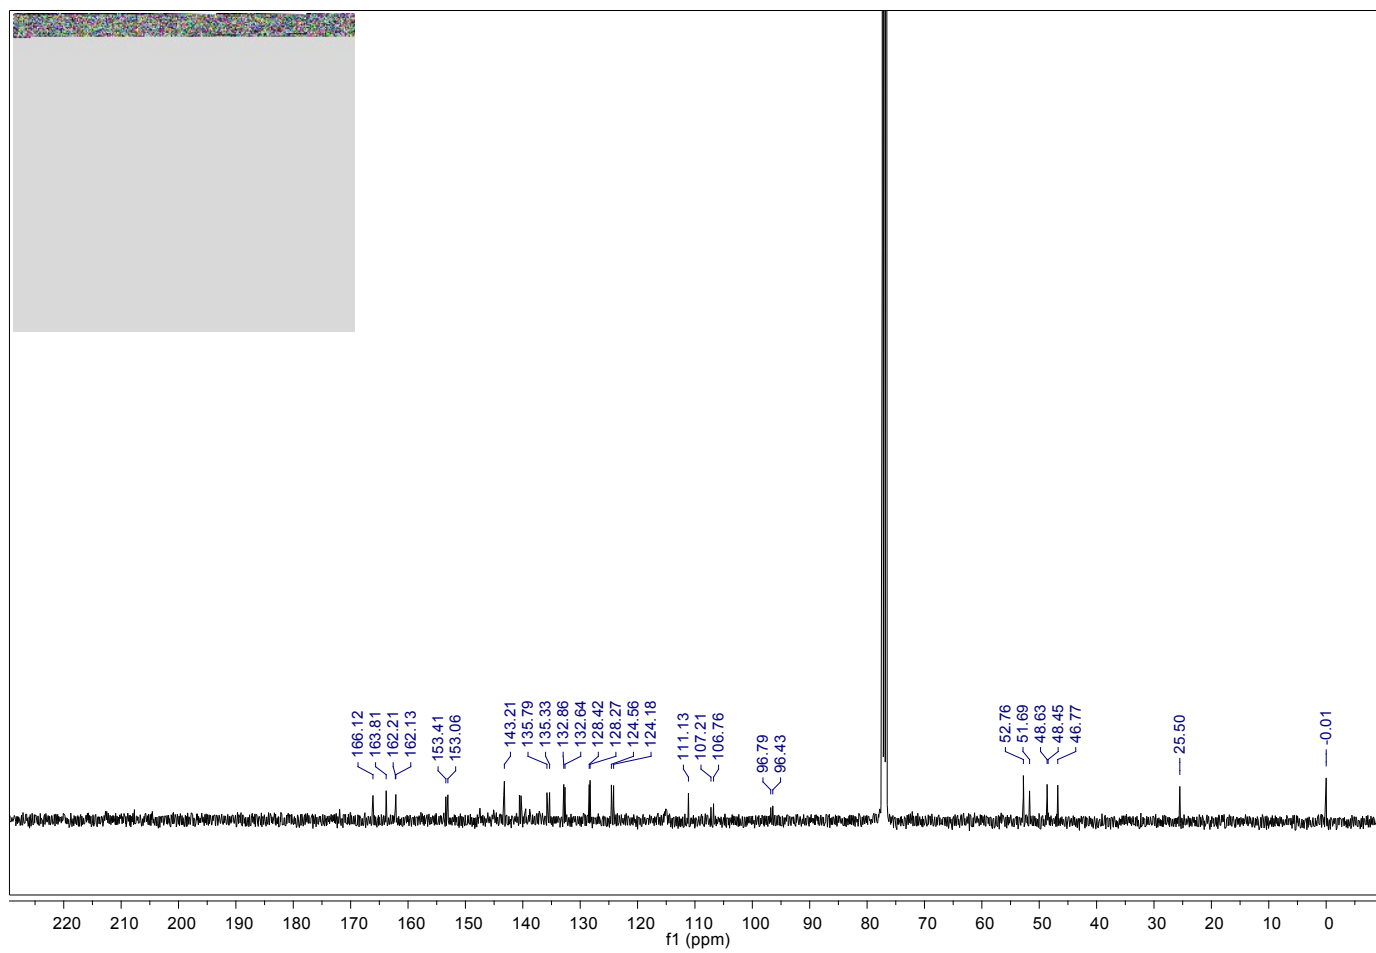

Figure S2. (c)  $^{13}\text{C}$  NMR spectrum of chlorin 4 in  $\text{CDCl}_3$ .

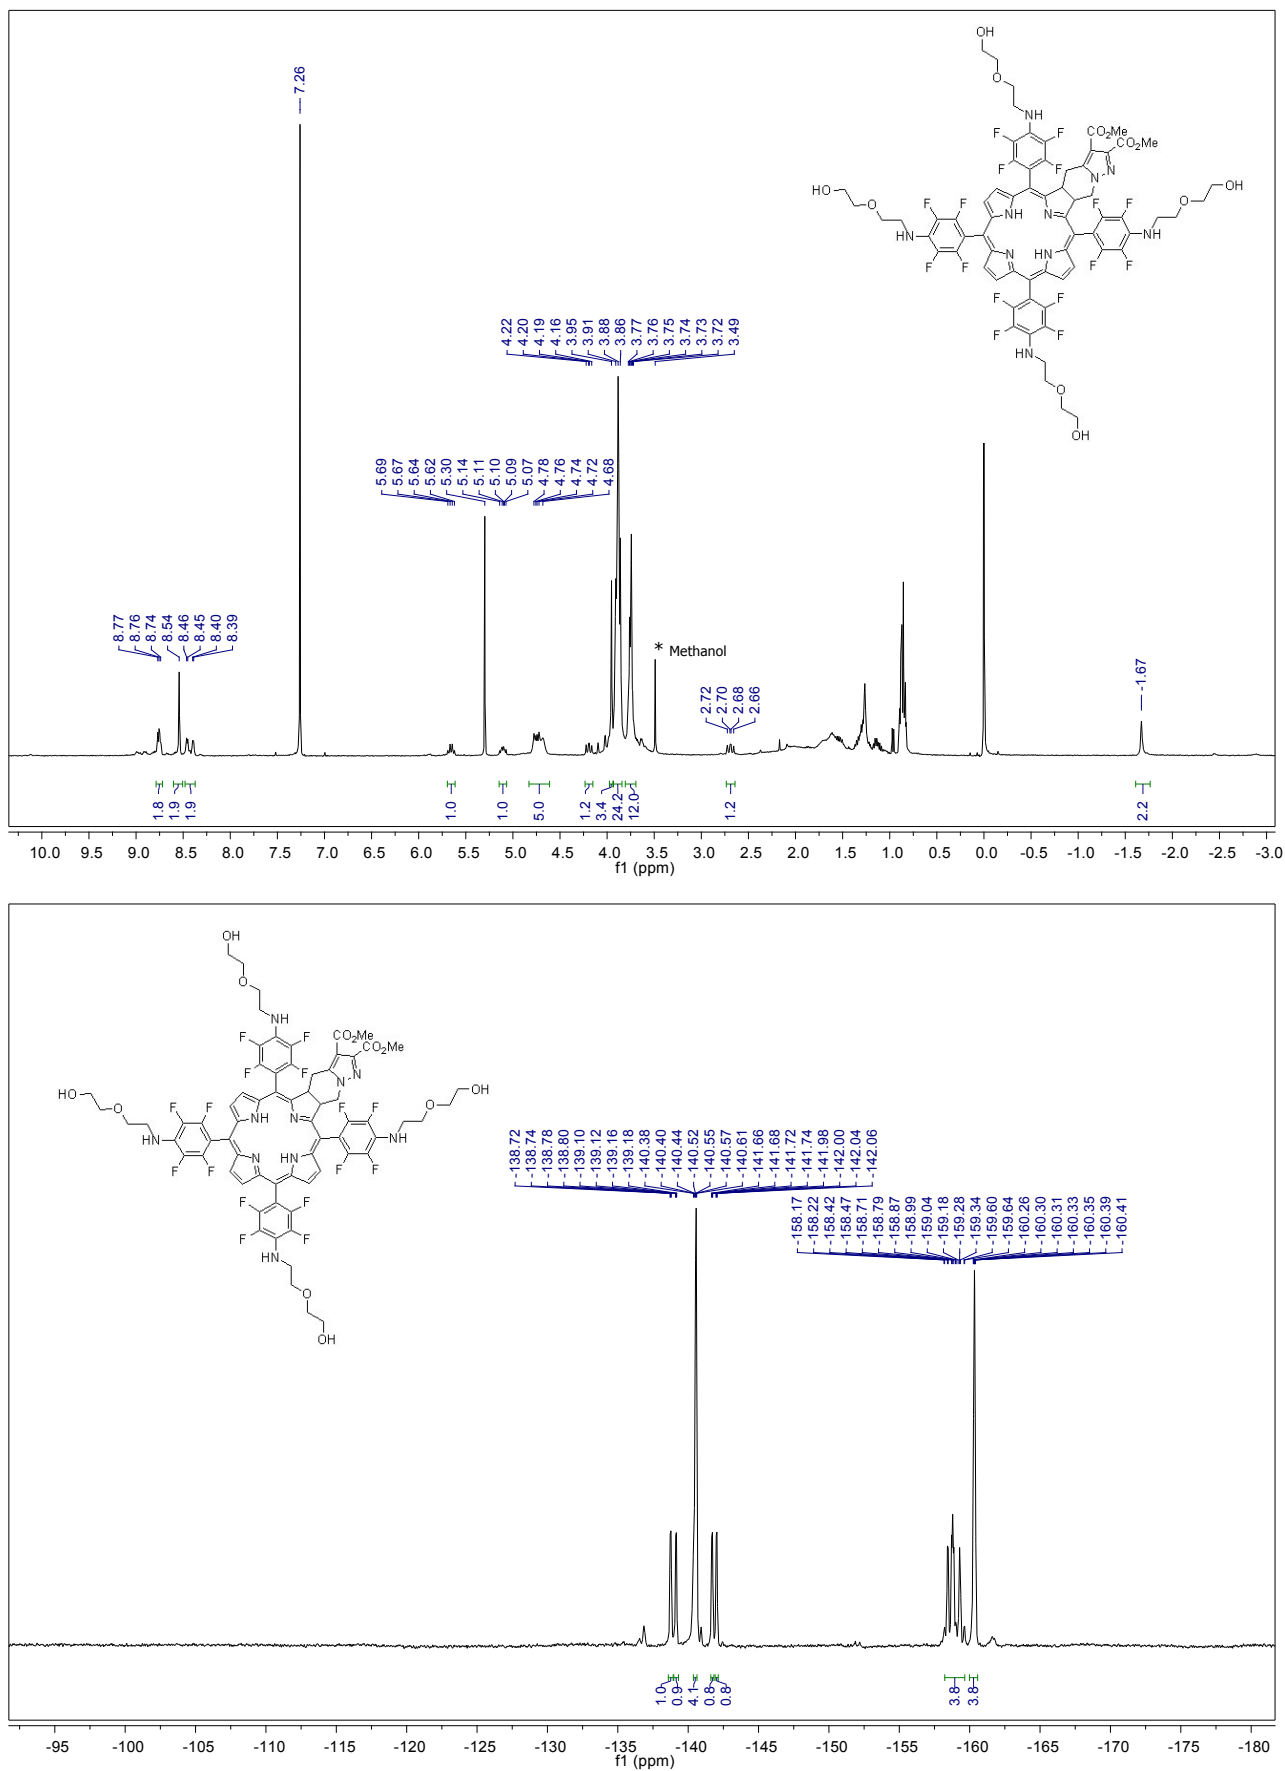

**Figure S3.** (a)  $^1\text{H}$  NMR spectrum (top) and (b)  $^{19}\text{F}$  NMR spectrum (bottom) of chlorin **6** in  $\text{CDCl}_3$ .

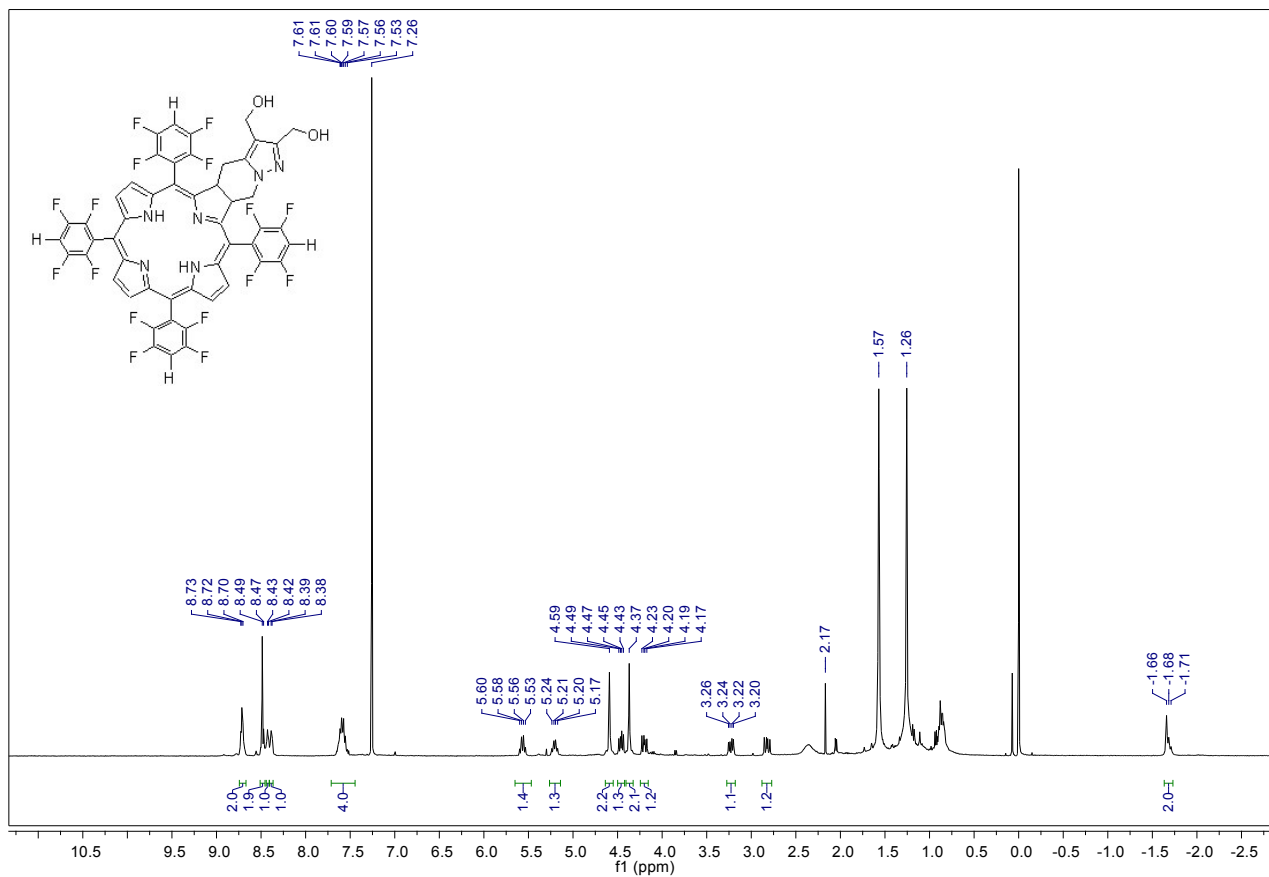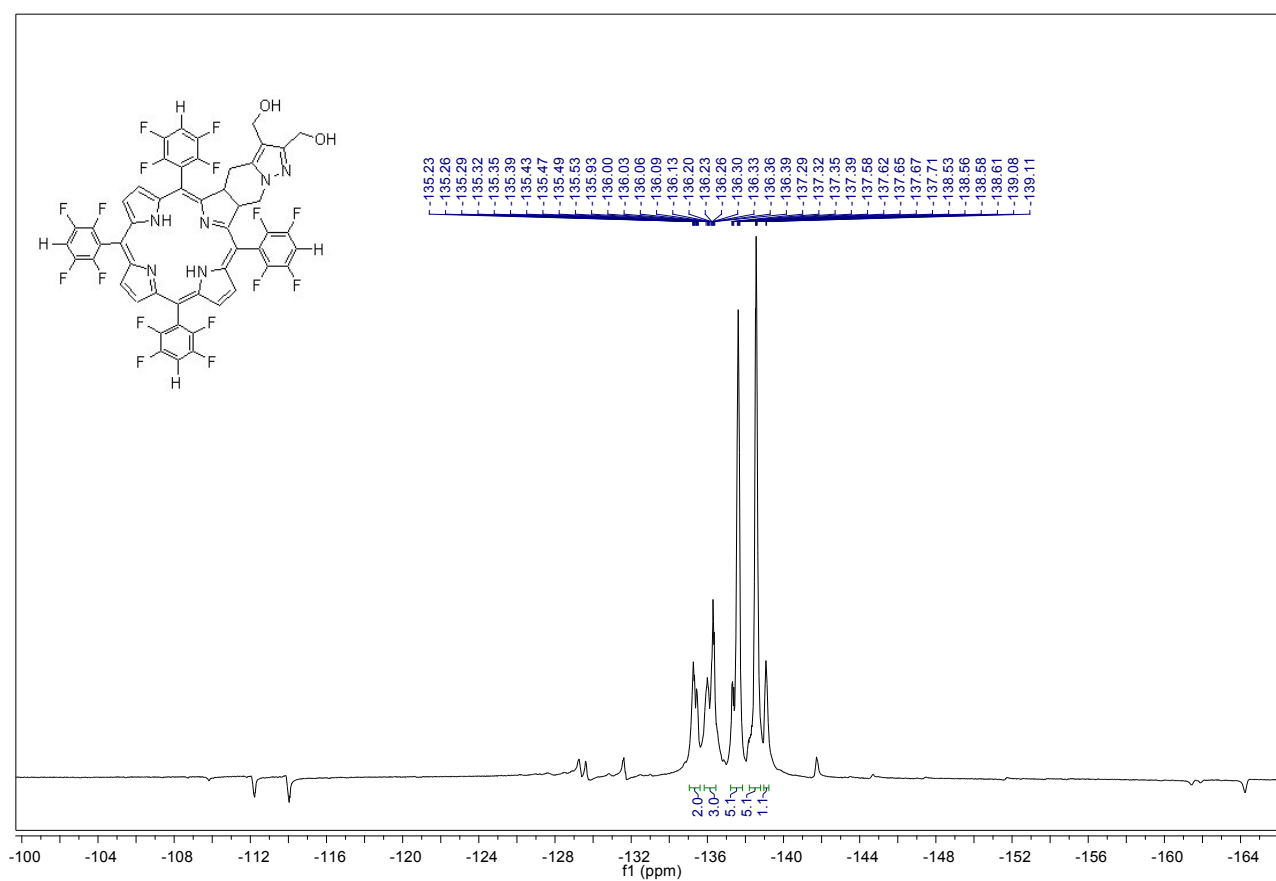

Figure S4. (a)  $^1\text{H}$  NMR spectrum (top) and (b)  $^{19}\text{F}$  NMR spectrum (bottom) of chlorin 7 in  $\text{CDCl}_3$ .

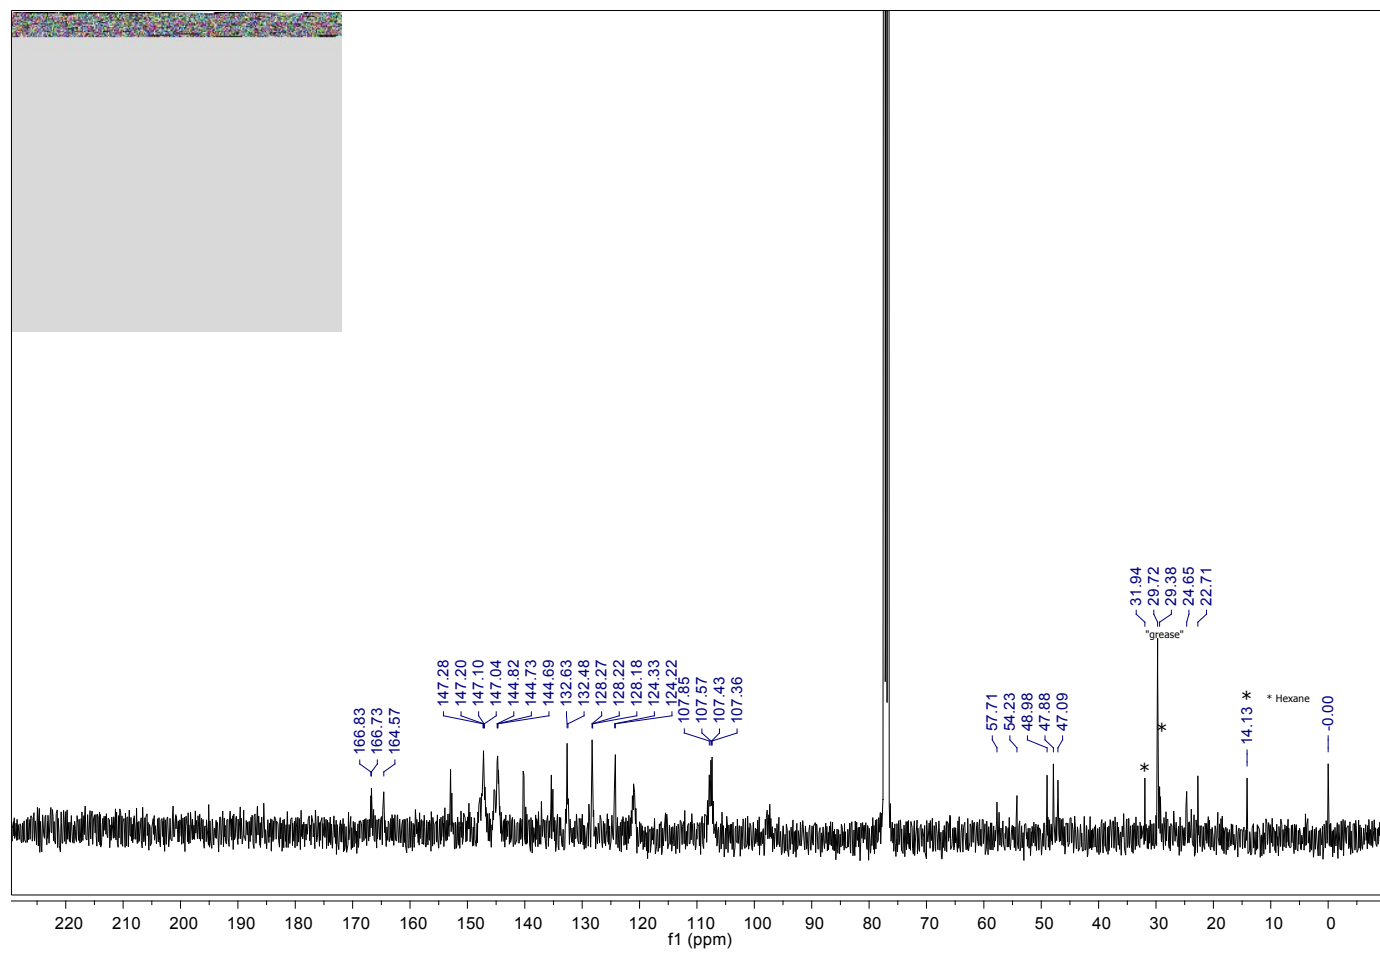

Figure S4. (c)  $^{13}\text{C}$  NMR spectrum of chlorin 7 in  $\text{CDCl}_3$ .

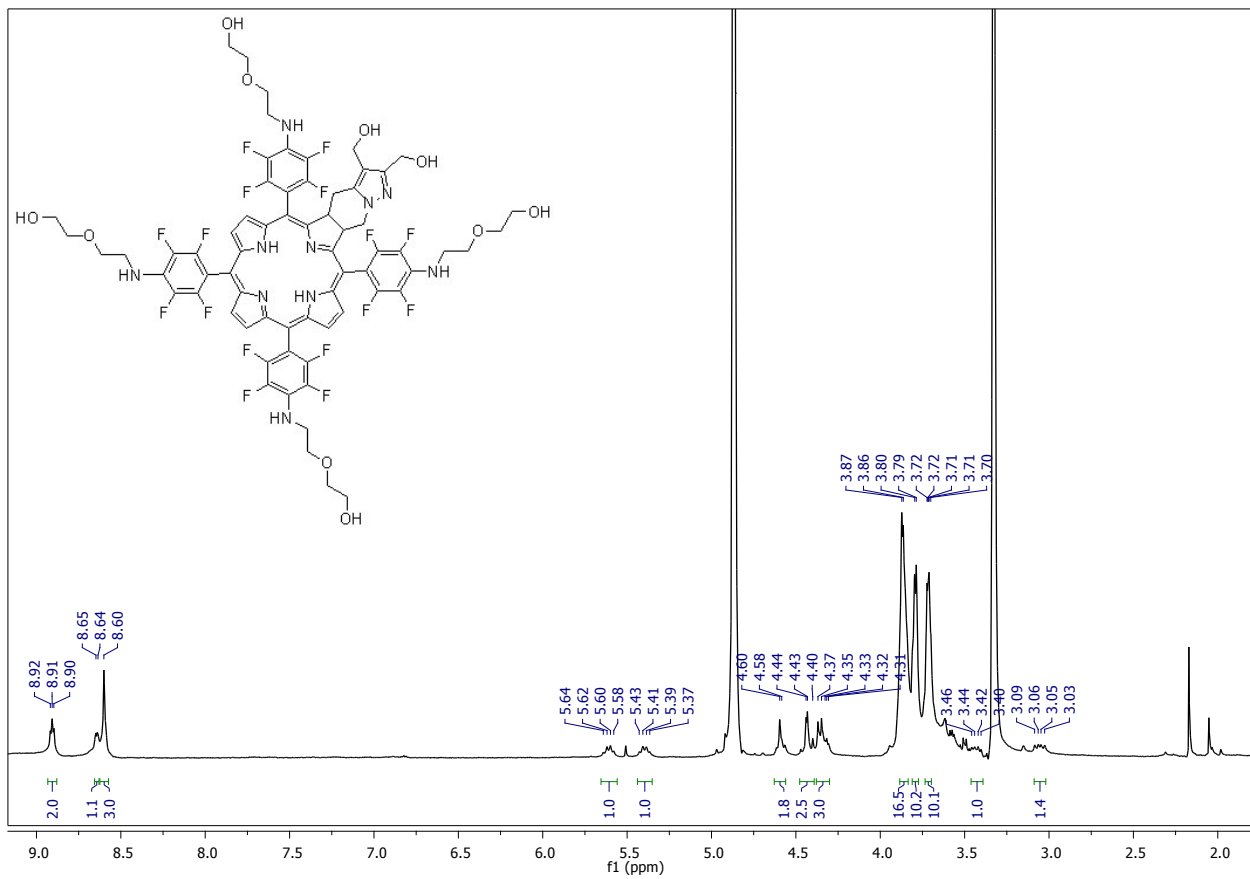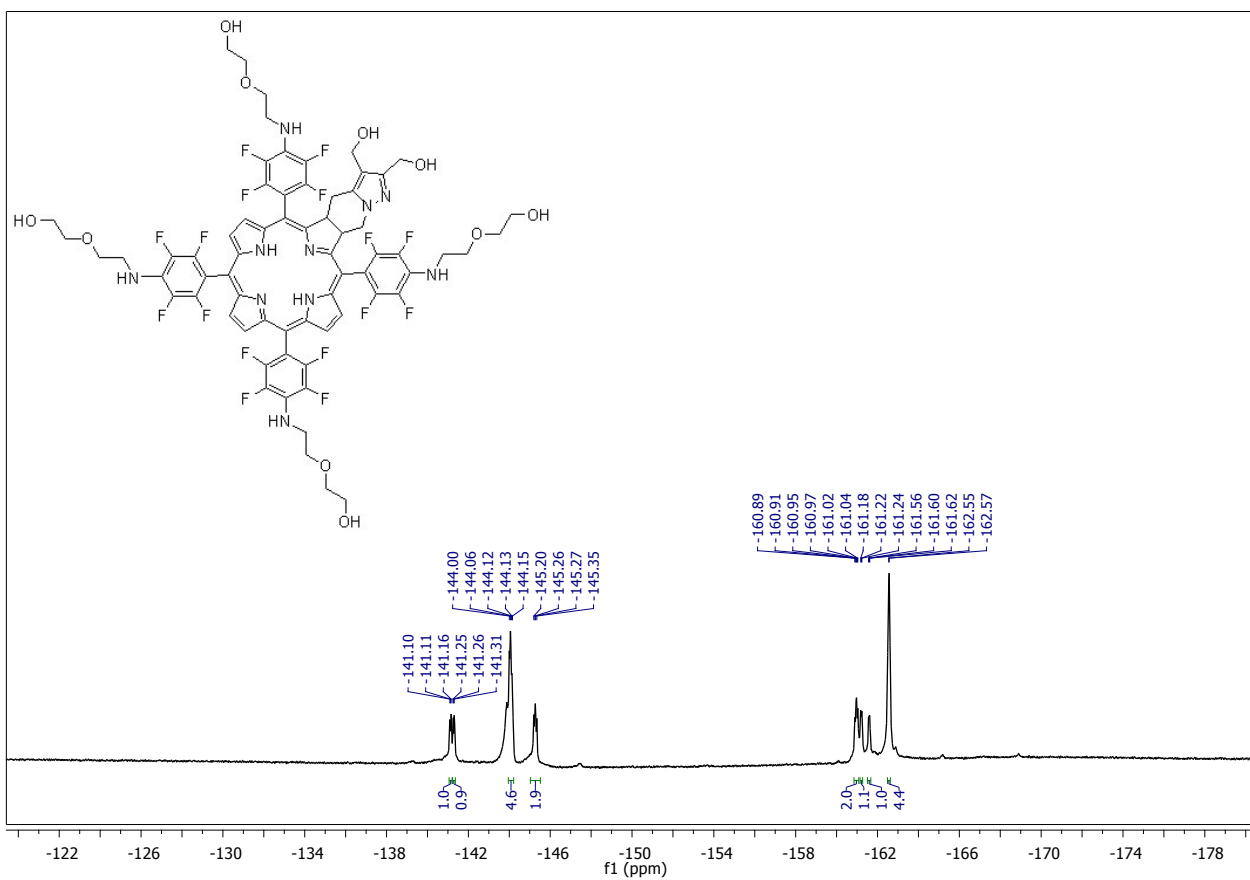

Figure S5. (a) <sup>1</sup>H NMR spectrum (top) and (b) <sup>19</sup>F NMR spectrum (bottom) of chlorin 8 in CD<sub>4</sub>O.



## II. Photophysical Spectra of Chlorins 4 and 6-8

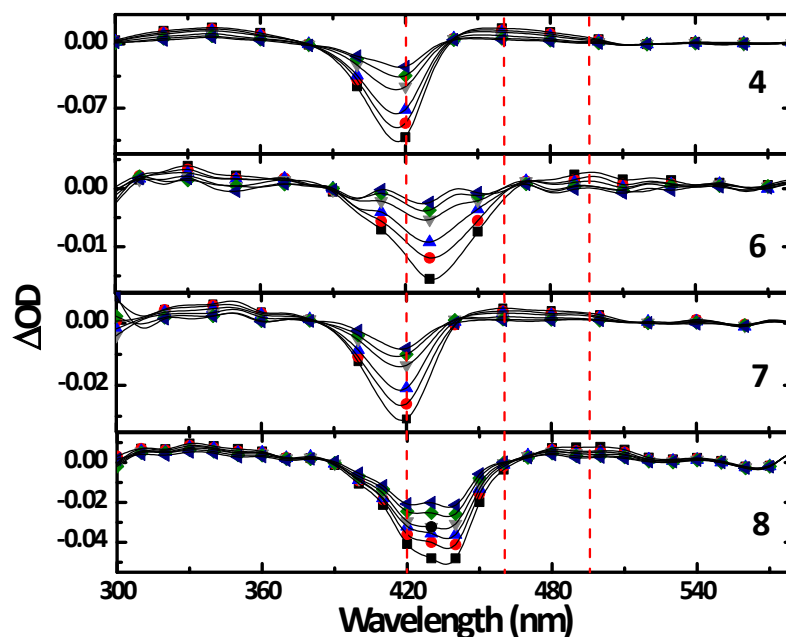

**Figure S6.** Room temperature time-resolved triplet-singlet difference absorption spectra for chlorins **4** and **6-8** in deaerated DMSO solutions, measured at various times after 355 nm nanosecond laser flash spectroscopy (12, 24, 40, 80, 120 and 160  $\mu$ s delay after flash).

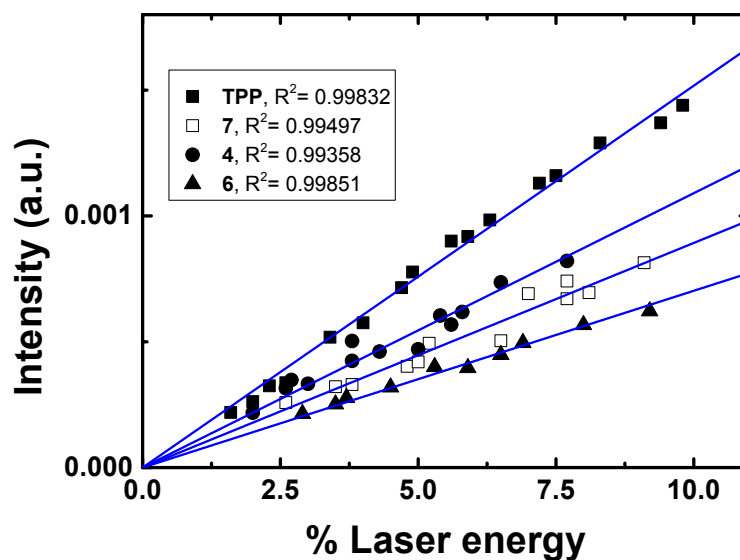

**Figure S7-** Plots of the initial phosphorescence of singlet oxygen at 1270 nm as a function of laser intensity together with the best fits to the linear part of the curve for the reference compound, *meso*-tetraphenylporphyrin (TPP), and chlorins **4**, **6** and **7** in air saturated toluene and dimethyl sulfoxide solutions, respectively, at 293 K.
